# Supplementary material
Source: Springer Nature journal article supplement (https://www.springermedizin.de/resource/supplementary/13231_2011_42_MOESM4_ESM.pdf/9676394)

**A**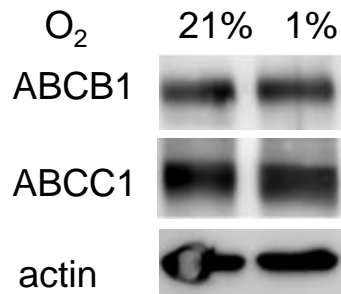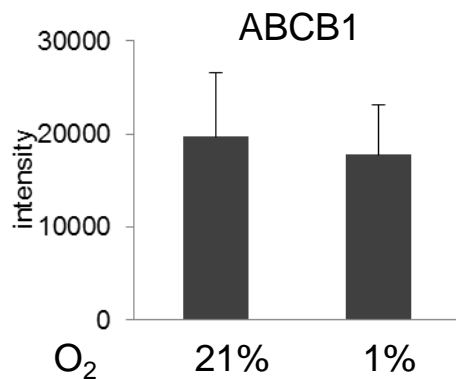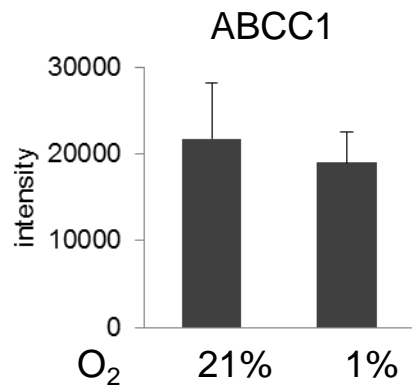**B**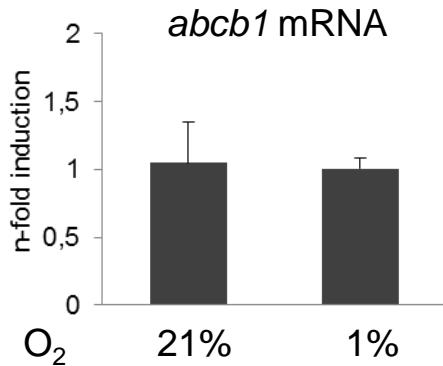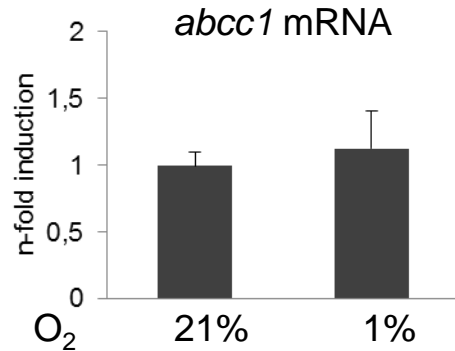

Supplement: MOESM4 [file 9676394]
